# Supplementary material for: The Cross-Talk between Myeloid and Mesenchymal Stem Cells of Human Bone Marrow Represents a Biomarker of Aging That Regulates Immune Response and Bone Reabsorption
Source: MDPI journal article supplement (doi:10.3390/cells11010001), 2021-12-21
Supplement: s1 [file s1]

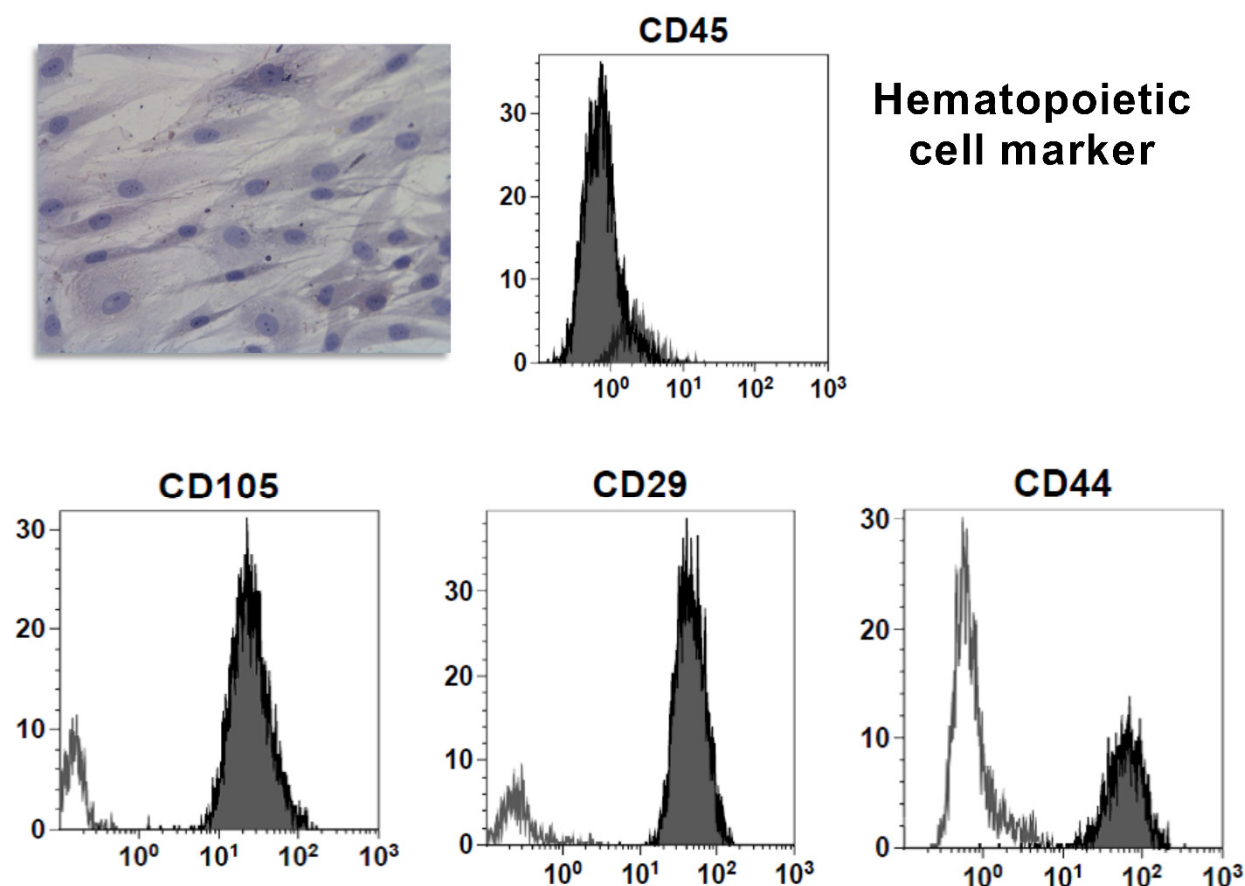

## Adhesion and Mesenchymal cell markers

**Figure S1.** Representative BM-MSCs' characterization. A. Morphology. B. Representative plot of multicolor flow cytometry showing the expression/adhesion cell markers CD44<sup>+</sup> (glycoprotein), CD29<sup>+</sup> (β-integrin), and CD105<sup>+</sup>s (endoglin) expression in the absence of hematological marker CD45.

**Supplementary Table S1.** Absolute number (concentration) of WBCs and RBCs and percentage of Neutrophils, according to age or site of BM sampling.

| Volunteers                   | Youngsters    | Adults         | Elders          | Site of BM sampling |               |              |
|------------------------------|---------------|----------------|-----------------|---------------------|---------------|--------------|
| Age (range)                  | 18-35         | 36-65          | 65-92           | Femur               | Iliac Crest   | Sternum      |
| WBC<br>(10 <sup>3</sup> /ml) | 68413 ± 32914 | 40711 ± 29031* | 25532 ± 18047** | 31650 ± 220305      | 52280 ± 26307 | 18725 ± 6167 |
| RBC<br>(10 <sup>6</sup> /ml) | 4.22 ± 1      | 3.45 ± 2       | 3.35 ± 1.2      | 4.29 ± 1            | 3.45 ± 2      | 4.7 ± 3      |
| Neutrophils<br>(%)           | 62.45 ± 6     | 64 ± 12        | 63 ± 2          | 62.14 ± 14          | 51 ± 15       | 53 ± 16      |

\*  $p < 0.05$ .**Supplementary Table S2.** Percentage of suppression of heterologous (Hetero) or autologous (Auto) T cell proliferation exerted by youngsters or adults or elders I-MDSCs either purified freshly (EX VIVO) or upon treatment with by G/GM CSF (G/GM induced).

| Ratio<br>I-MDSC/PBMC | 2:1     |         |              | 1:1     |         |              | 0.5:1   |        |              |
|----------------------|---------|---------|--------------|---------|---------|--------------|---------|--------|--------------|
| I-MDSC               | EX VIVO |         | G/GM induced | EX VIVO |         | G/GM induced | EX VIVO |        | G/GM induced |
| Target               | Hetero  | Auto    | Hetero       | Hetero  | Auto    | Hetero       | Hetero  | Auto   | Hetero       |
| Youngsters           | 16 ± 32 | 34 ± 30 | 74 ± 21      | 10 ± 21 | 16 ± 17 | 47 ± 26      | 5 ± 14  | 0      | 17 ± 19      |
| Adults               | 31 ± 34 | 50 ± 15 | 75 ± 8       | 16 ± 25 | 26 ± 14 | 34 ± 20      | 9 ± 15  | 4 ± 6  | 10 ± 16      |
| Elders               | 51 ± 24 | 66 ± 20 | 66 ± 22      | 36 ± 26 | 29 ± 16 | 49 ± 20      | 14 ± 12 | 8 ± 12 | 14 ± 19      |
